# Supplementary material
Source: Royal Society of Chemistry journal article supplement (doi:10.1039/d6cc01519k)
Supplement: d6cc01519k1.pdf [file d6cc01519k1.pdf]

### Supporting Information

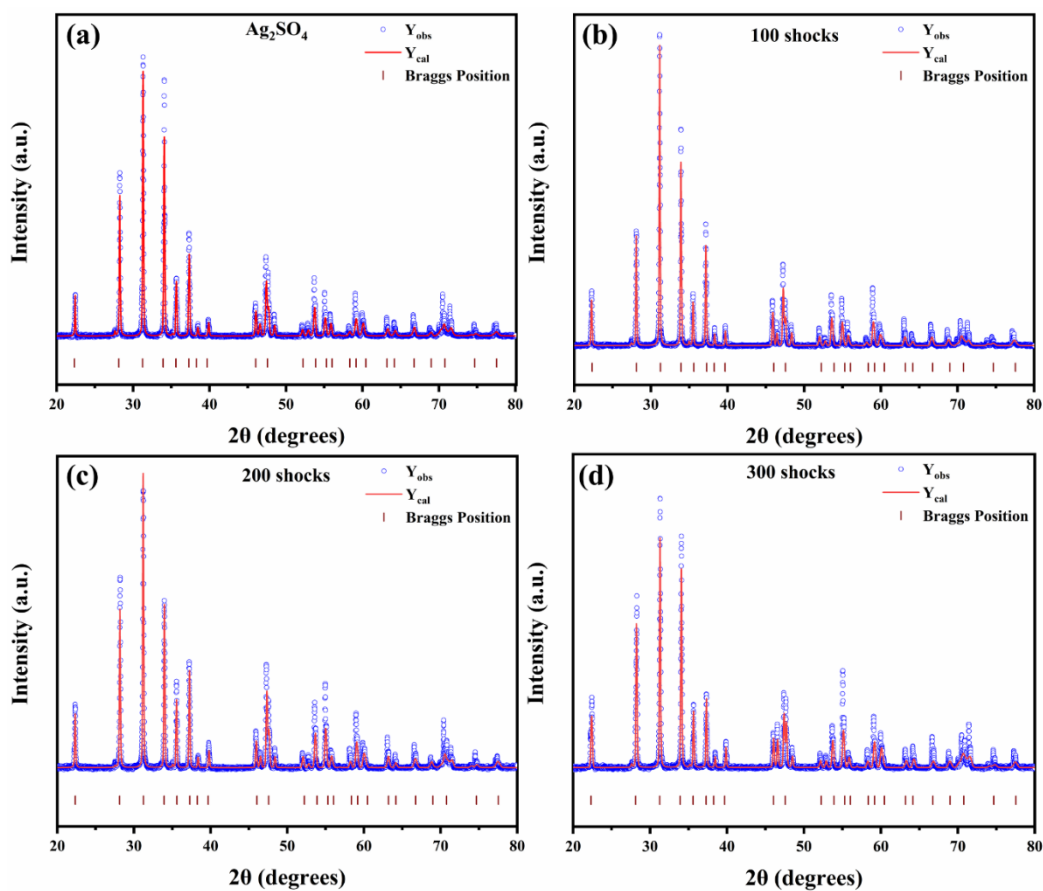

**Figure 1:** Rietveld refinement patterns for (a) untreated, (b) 100 shocks, (c) 200 shocks, and (d) 300 shock-loaded ASO microparticles.
